# Supplementary material for: OsOFP6 Overexpression Alters Plant Architecture, Grain Shape, and Seed Fertility
Source: MDPI journal article supplement (doi:10.3390/ijms25052889), 2024-03-01
Supplement: s1 [file s1]

## Supplementary Material

### OsOFP6 Overexpression Alters Plant Architecture, Grain Shape, and Seed Fertility

Xuting Zhu <sup>1,2,†</sup>, Yuan Li <sup>1,2,†</sup>, Xiangqian Zhao <sup>1</sup>, Yukai Feng <sup>1,2</sup>, Zhengkai Bao <sup>1</sup>, Wenzhen Liu <sup>2,\*</sup> and Feifei Li <sup>1,\*</sup>

<sup>1</sup>College of Advanced Agricultural Science, Zhejiang A&F University, Hangzhou 311300, China;

zxt1477702045@163.com (X.Z.); lylylyyqq@163.com (Y.L.); zhaoxq@zafu.edu.cn (X.Z.);

fengyukai0103@163.com (Y.F.); 15088793603@163.com (Z.B.)

<sup>2</sup> State Key Laboratory of Rice Biology and Breeding, China National Rice Research Institute, Hangzhou 311400, China

\* Correspondence: liuwenzhen@caas.cn (W.L.); lifei-fei@163.com (F.L.)

† These authors contributed equally to this work.

### Supplementary Tables

#### Supplementary Table S1. Primers used in TAIL PCR.

| Primer | Primer sequence (5'-3')          |
|--------|----------------------------------|
| TL1    | TCCCAGATAAGGGAATTAGGGTTCCTA      |
| TL2    | GTTTCCTATAGGGTTTCGCTCATGTGTTG    |
| TL3    | CCAGTACTAAAATCCAGATCCCCCGA       |
| AD1    | NTCGA(G/C)T(A/T)T(G/C)G(A/T)GTT  |
| AD2    | NGTCGA(G/C)(A/T)GANA(A/T)GAA     |
| AD3    | (A/T)GTGNAG(A/T) ANCANAGA        |
| AD4    | NGTA(G/C)A(G/C)(A/T)GTNA(A/T)CAA |

#### Supplementary Table S2. Primers were used to knock out vector.

| Primer | Primer sequence (5'-3')   |
|--------|---------------------------|
| gRNA1  | GTTGGCGCGCCGCCCCGGGGAGGTG |
| gRNA2  | AAACCACCTCCCCGGGCGGCGCGC  |
| gRNA3  | GTTGGACCGAGAAGAGGCCCGACA  |
| gRNA4  | AAACTGTCGGGCCTCTTCTCGGTC  |

#### Supplementary Table S3. Primers were used to construct overexpression vectors.

| Primer                              | Primer sequence (5'-3')    |
|-------------------------------------|----------------------------|
| <i>OsOFP6</i> -Flag- <i>Bam</i> H I | GGATCCATGGGGAGGCACAAGTTCAG |
| <i>OsOFP6</i> -Flag- <i>Kpn</i> I   | GGTACCCATCTTGATGTCCGCGAGGT |

**Supplementary Table S4.** Primers used in this study for gene expression analysis by qRT-PCR.

| Primer              | Primer sequence (5'-3') |
|---------------------|-------------------------|
| <i>ACTIN1-F</i>     | TGCTATGTACGTCGCCATCCAG  |
| <i>ACTIN1-R</i>     | AATGAGTAACCACGCTCCGTCA  |
| <i>RT-OsOFP6-F</i>  | CGTCGACGTGTTTCGAGCATA   |
| <i>RT-OsOFP6-R</i>  | GGATTCACCATGCAAGACAAGA  |
| <i>Q-OsCPS-F</i>    | TCTCCCCTTCAGCTACTGCT    |
| <i>Q-OsCPS-R</i>    | ACGCCTCCGTCGAATTTCTT    |
| <i>Q-OsKAO-F</i>    | CTTCCTCCATCATTTTCTCC    |
| <i>Q-OsKAO-R</i>    | AAGCAGTTGTCCACAGGC      |
| <i>Q-GA3ox1-F</i>   | TGATTGCAATTATCCATGCCAG  |
| <i>Q-GA3ox1-R</i>   | TCCTGGTTCTACAGTGAAACTC  |
| <i>Q-OsGA13ox-F</i> | AGAAGTGGAGAAAAGACTACGG  |
| <i>Q-OsGA13ox-R</i> | CAATGATCTTTCTCTGGTGTGC  |
| <i>Q-GA20ox3-F</i>  | CTACCGGTCGGACACCAACA    |
| <i>Q-GA20ox3-R</i>  | TTTGCTTGATCCAGGCGACG    |
| <i>Q-OsGID2-F</i>   | AGAGAGCCGTGGTAATGAGG    |
| <i>Q-OsGID2-R</i>   | AAGACCTTGGACTCTGGAGC    |
| <i>Q-SLR1-F</i>     | GACGTCAACGAACGCTCAATT   |
| <i>Q-SLR1-R</i>     | CGGAGTCCAGTCGTCGATCT    |
| <i>Q-D2-F</i>       | GCTCAAGAGGCGAAAAACCG    |
| <i>Q-D2-R</i>       | ACCGCAGCGTCTCTGTTATC    |
| <i>Q-D11-F</i>      | TCACTGCTCCAGGTATGGGA    |
| <i>Q-D11-R</i>      | ATGAATTGGCCTGGGGTAGC    |
| <i>Q-CPD-F</i>      | CCCACCACACGAACTCTCAA    |
| <i>Q-CPD-R</i>      | AAGAGCAGCTGCAAAACGAC    |
| <i>Q-DWARF-F</i>    | CACCAGGGAGAAGCTCACAG    |
| <i>Q-DWARF-R</i>    | TCTTCGGGCGCTTTACCTTT    |
| <i>Q-DWARF4-F</i>   | GAAGAGCGGGTTGAGAAGC     |
| <i>Q-DWARF4-R</i>   | CAGAGCCCATCCGAGAAGA     |
| <i>Q-BZR1-F</i>     | CCATGGAGATAGAAGGGACGG   |
| <i>Q-BZR1-R</i>     | GTCACCCTCCCCTTGTCGAA    |

**Supplementary Table S5.** Primers were used for hygromycin verification.

| Primer | Primer sequence (5'-3') |
|--------|-------------------------|
| HPT-F  | TGTTGGCGACCTCGTATTGG    |
| HPT-R  | CTTCGATGTAGGAGGGCGTG    |

**Supplementary Table S6.** Primers were used for coseparation analysis.

| Primer | Primer sequence (5'-3') |
|--------|-------------------------|
| P1     | AAGATCGCAATTCGCAAGGT    |
| P2     | CGTAGGATCGTGTGGTAATGAA  |
| P3     | CGTCCGAGGGCAAAGAAATAG   |

**Supplementary Table S7.** Primers were used to construct subcellular localization vector.

| Primer                             | Primer sequence (5'-3')     |
|------------------------------------|-----------------------------|
| <i>OsOFP6</i> -GFP- <i>Bam</i> H I | TCTAGACATGGGGAGGCACAAGTTCAG |
| <i>OsOFP6</i> -GFP- <i>Xba</i> I   | GGTACCTTGAGACTGAGCTCTTCCG   |

**Supplementary Table S8.** Primers were used to construct protein interaction vectors.

|              |                                               |
|--------------|-----------------------------------------------|
| Y-OsOFP6-F   | atatggccatggaggccGAATTCATGGGGAGGCACAAGTTCAGG  |
| Y-OsOFP6-R   | atgctagttagcgccgCTGCAGCTACATCTTGATGTCCGCGAGG  |
| Y-E3BB-F     | CCGGAATTCTCATCAATGGCAACTCCA                   |
| Y-E3BB-R     | CGCGGATCCCACAACGCAAACATCACC                   |
| BI-OsOFP6-F  | tggcgcgccactagtggatccATGGGGAGGCACAAGTTCAGG    |
| BI-OsOFP6-R  | agcggtagcctcgaggtcgacCATCTTGATGTCCGCGAGGT     |
| BI-E3BB-F    | tggcgcgccactagtggatccATGGCAACTCCAAATACCTATTCA |
| BI-E3BB-R    | agcggtagcctcgaggtcgacCCCAAATACCTCCTCATTGCA    |
| cLU-OsOFP6-F | tacgcgtcccggggcggtaccATGGGGAGGCACAAGTTCAGG    |
| cLU-OsOFP6-R | acgaaagctctgcaggtcgacCTACATCTTGATGTCCGCGAGG   |
| nLU-E3BB-F   | cgagctcggtaccgggatccATGGCAACTCCAAATACCTATTCA  |
| nLU-E3BB-R   | cgcgtacgagatctggtcgacCCCAAATACCTCCTCATTGCA    |

## Supplementary Figures

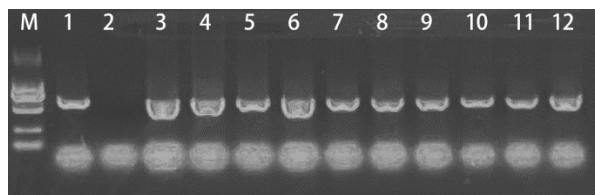

**Supplementary Figure S1.** PCR assay revealed that the mutant was co-isolated with T-DNA insertion. M: marker 2000bp, 1: positive control, 2: wild-type plant, 3-12: mutants
